# Supplementary material for: Photonic welding of ultra-long copper nanowire network for flexible transparent electrodes using white flash light sintering
Source: Royal Society of Chemistry journal article supplement (doi:10.1039/c5ra25548a), 2016-01-01
Supplement: c5ra25548a1.pdf [file c5ra25548a1.pdf]

### Supplementary Information

## Photonic welding of Ultra-long Copper Nanowire Network for Flexible Transparent Electrodes using White Flash Light Sintering

K. Mallikarjuna <sup>a,b</sup>, Hyun-Jun Hwang<sup>a</sup>, Wan-Ho Chung<sup>a</sup>, Hak-Sung Kim<sup>a,b,\*</sup>

<sup>a</sup>Department of Mechanical Engineering, Hanyang University, Haengdang-dong, Seongdong-gu, Seoul 133-791, South Korea

<sup>b</sup>Institute of Nano Science and Technology, Hanyang University, Seoul, 133-791, South Korea

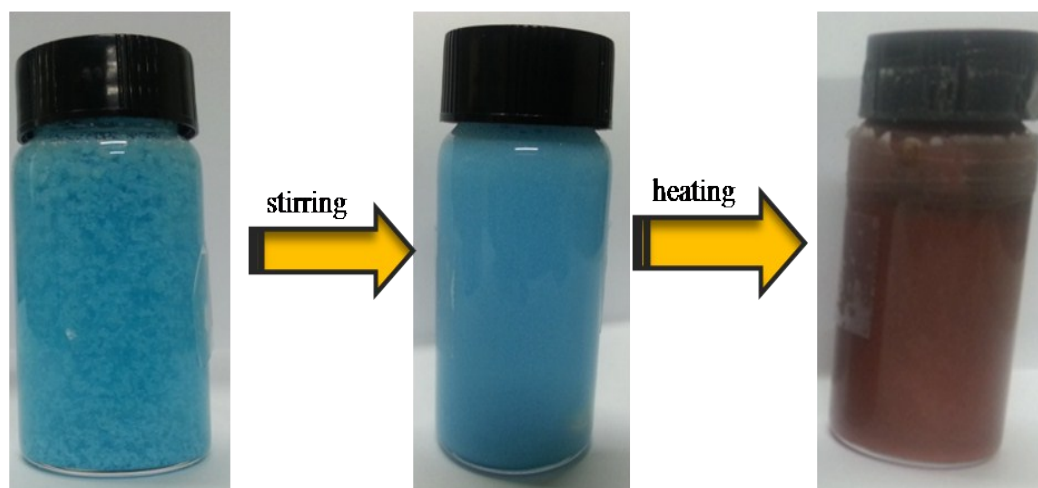

**Figure S1:** The color changes in the fabrication process of Cu NWs synthesis.

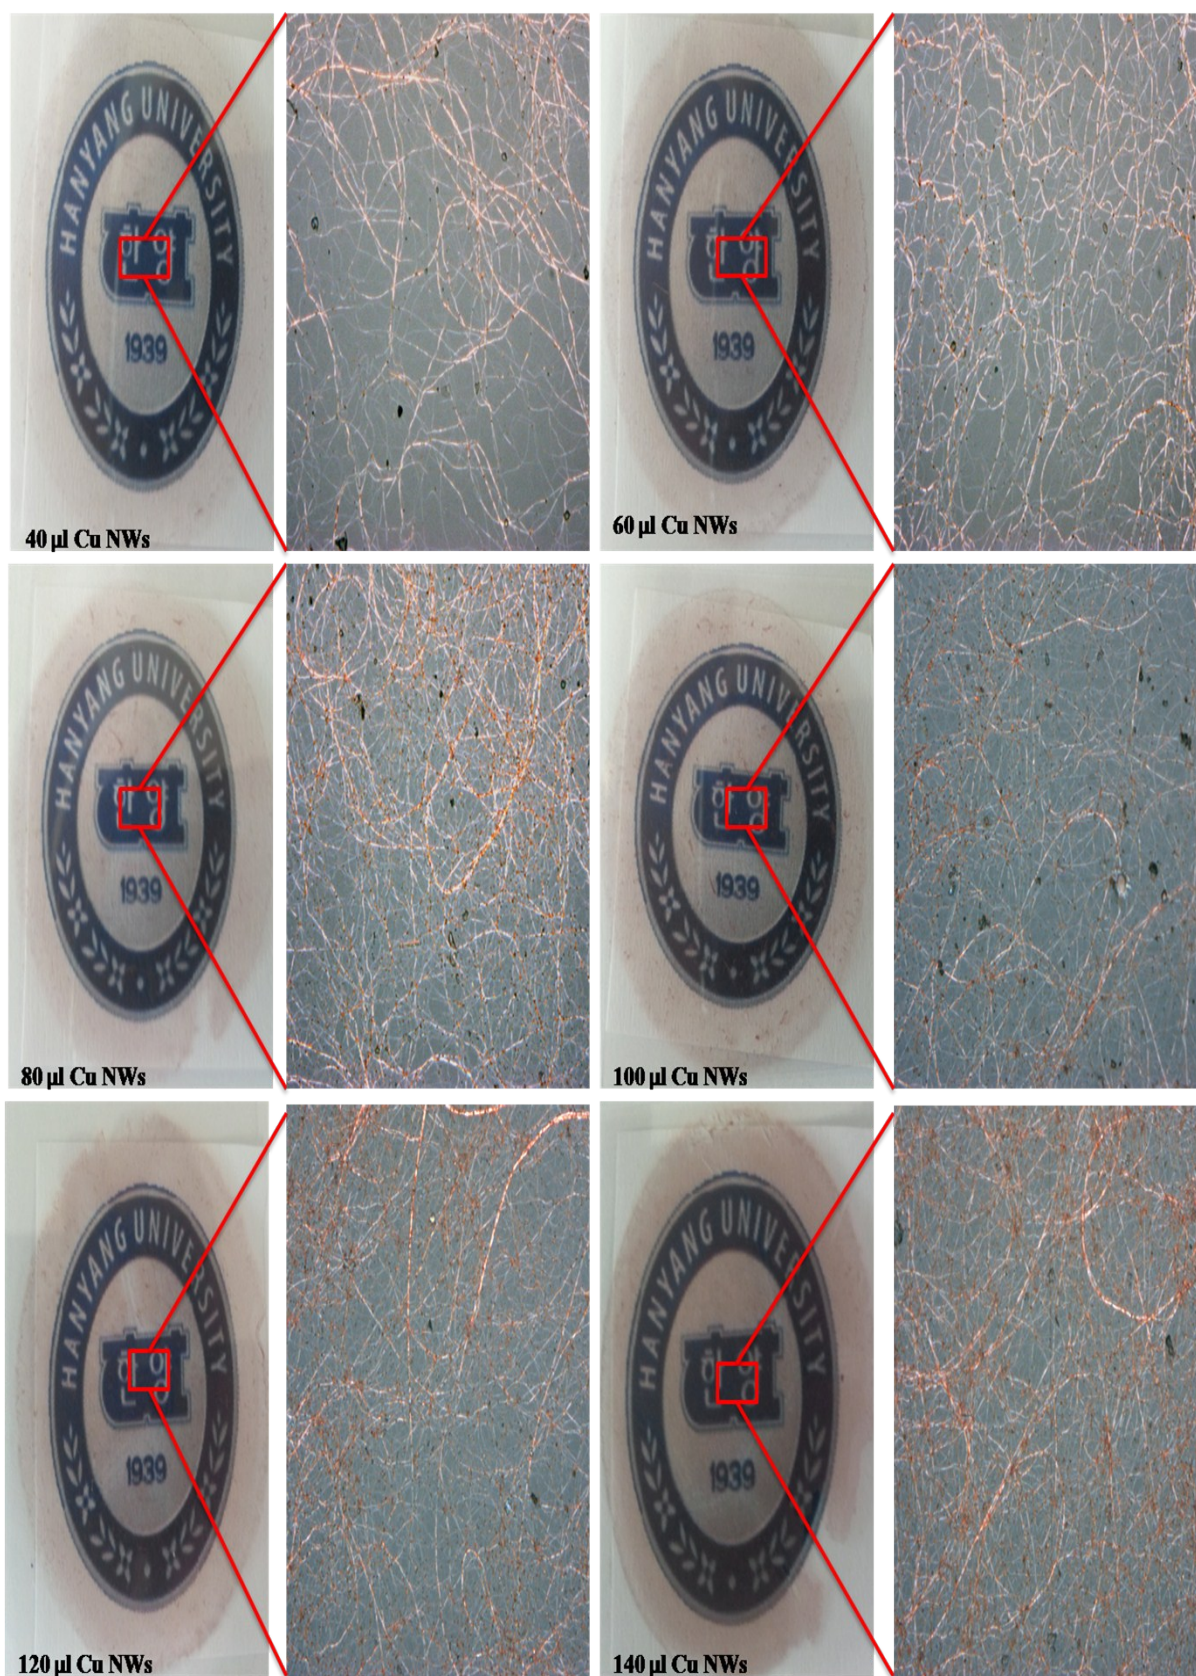

**Figure S2:** The optical microscopy images of different concentration of Cu NW ink printed on PET substrate.
